# Supplementary material for: Microscopic origin of the extremely low thermal conductivity and outstanding thermoelectric performance of BiSbX3 (X = S, Se) revealed by first-principles study
Source: Royal Society of Chemistry journal article supplement (doi:10.1039/d0cp01231a), 2020-01-01
Supplement: d0cp01231a1.pdf [file d0cp01231a1.pdf]

## Supplementary Information

### Microscopic origin of the extremely low thermal conductivity and outstanding thermoelectric performance of $\text{BiSbX}_3$ ( $\text{X}=\text{S}, \text{Se}$ ) revealed by first-principles study

Ziye Zhang, Renqi Zhang, Ning Qi, Yichu Wu,\* and Zhiquan Chen\*

*Hubei Nuclear Solid Physics Key Laboratory, Department of Physics, Wuhan University,  
Wuhan 430072, China*

E-mail: ycwu@whu.edu.cn; chenzq@whu.edu.cn

#### Contents :

Fig. S1: The convergence tests for the cutoff interactions of nearest neighbors in the third-order IFCs.

Fig. S2: Calculated 3D and 2D ELF of  $\text{BiSbS}_3$ .

Fig. S3: The lattice thermal conductivities of infinite and finite size for  $\text{BiSbSe}_3$  and  $\text{BiSbS}_3$  as a function of temperature.

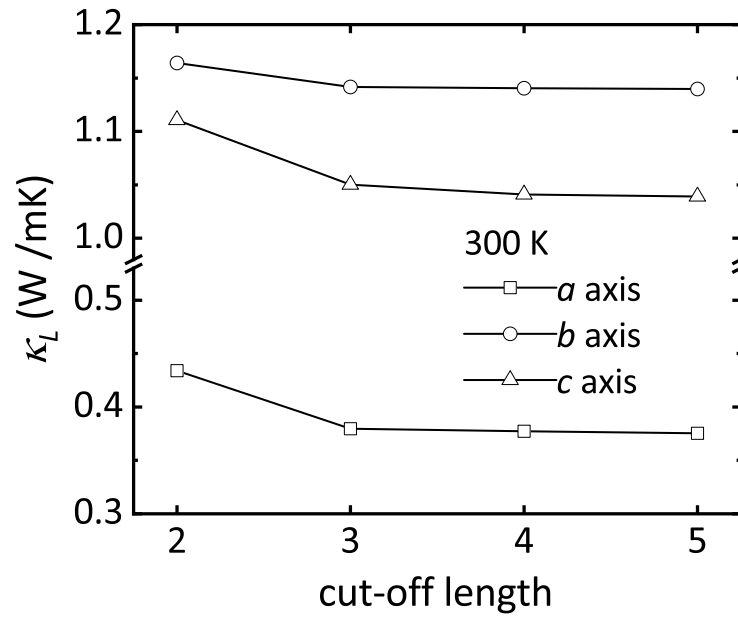

Fig. S1: The convergence tests for the cutoff interactions of nearest neighbors in the third-order IFCs (BiSbSe<sub>3</sub> at 300K).

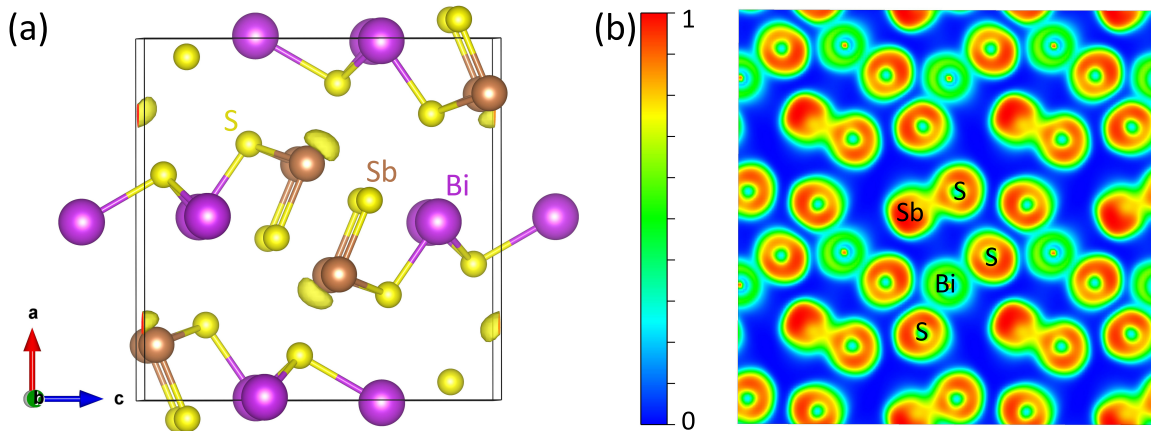

Fig. S2: (a) Calculated 3D ELF for BiSbS<sub>3</sub>. The isosurface level is 0.93. (b) The projected ELF of BiSbS<sub>3</sub> onto the (010) plane.

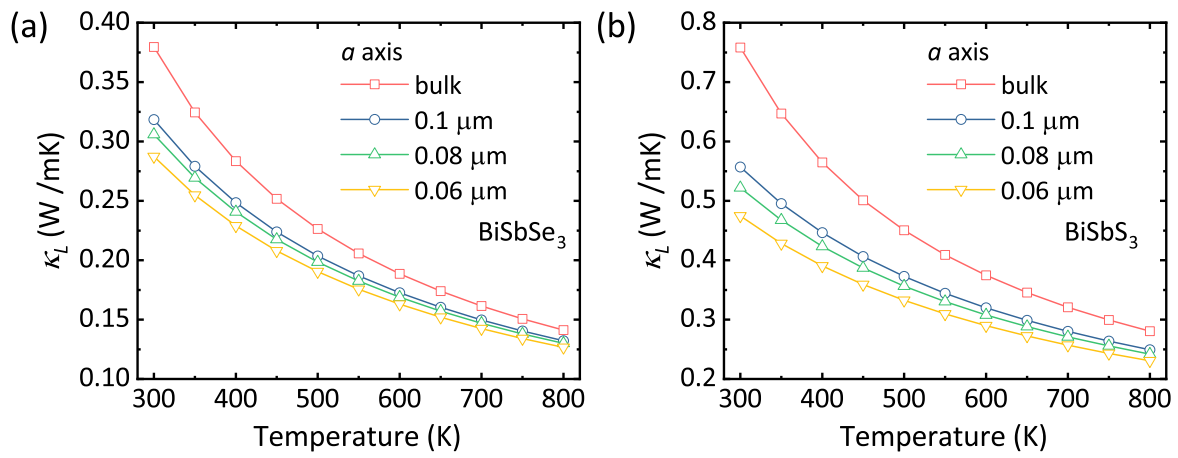

Fig. S3: The lattice thermal conductivities of infinite and finite size (0.1, 0.08, and 0.06  $\mu\text{m}$ ) for (a)  $\text{BiSbSe}_3$  and (b)  $\text{BiSbS}_3$  as a function of temperature.
